# Supplementary material for: Correlation between Polymerase Chain Reaction Identification of Iron Acquisition Genes and an Iron-Deficient Incubation Test for Klebsiella pneumoniae Isolates from Bovine Mastitis
Source: Microorganisms. 2022 May 31;10(6):1138. doi: 10.3390/microorganisms10061138 (PMC9228167; doi:10.3390/microorganisms10061138)
Supplement: Supplementary file 1 [file microorganisms-10-01138-s001.zip › Table S1.pdf]

**Table S1.** Clinical data and milk conditions in bovine cases of mild mastitis caused by intramammary infections with *Klebsiella pneumoniae* tested in this study.

| Isolate | Farm | Age (days)<br>at exam | Days since<br>calving<br>at exam | Parity<br>at exam | Mastitis milk conditions      |            | Interval (days)<br>between exam<br>and death | Cause of the death                     |
|---------|------|-----------------------|----------------------------------|-------------------|-------------------------------|------------|----------------------------------------------|----------------------------------------|
|         |      |                       |                                  |                   | Bacterial counts <sup>1</sup> | Score [22] |                                              |                                        |
| #1      | A    | 1330                  | 17                               | 2                 | 8.28                          | 1          | 2277                                         | Culling (mastitis)                     |
| #2      | A    | 1378                  | 296                              | 2                 | 2.30                          | 3          | 541                                          | Culling (mastitis)                     |
| #3      | A    | 1794                  | 50                               | 3                 | 7.00                          | 3          | 1056                                         | Culling (low reproductive performance) |
| #4      | A    | 3006                  | 21                               | 5                 | 4.95                          | 3          | 662                                          | Culling (mastitis)                     |
| #5      | A    | 990                   | 3                                | 1                 | 7.85                          | 2          | 1493                                         | Death (unknown reason)                 |
| #6      | A    | 2741                  | 11                               | 6                 | 4.00                          | 1          | 36                                           | Culling (unknown reason)               |
| #7      | A    | 2585                  | 2                                | 5                 | 5.54                          | 2          | 1565                                         | Culling (low reproductive performance) |
| #8      | A    | 2479                  | 233                              | 4                 | 4.70                          | 3          | 605                                          | Culling (low reproductive performance) |
| #9      | B    | 2167                  | 228                              | 4                 | 7.00                          | 2          | 263                                          | Culling (planned for low productivity) |
| #10     | B    | 1297                  | 73                               | 2                 | 7.30                          | 2          | 1031                                         | Culling (lameness)                     |
| #11     | B    | 1479                  | 4                                | 3                 | 5.34                          | 4          | 664                                          | Culling (mastitis)                     |
| #12     | B    | 1245                  | 214                              | 2                 | 4.85                          | 1          | 411                                          | Culling (lameness)                     |
| #13     | C    | 2540                  | 211                              | 5                 | 6.78                          | 2          | 149                                          | Culling (low reproductive performance) |
| #14     | C    | 2281                  | 192                              | 4                 | 4.48                          | 3          | 93                                           | Culling (planned for low productivity) |
| #15     | C    | 2849                  | 142                              | 5                 | 7.30                          | 2          | Unknown                                      | Unknown                                |

|     |   |         |         |         |      |   |         |                          |
|-----|---|---------|---------|---------|------|---|---------|--------------------------|
| #16 | C | 1667    | 243     | 3       | 9.74 |   | 1033    | Death (unknown reason)   |
| #17 | D | 3371    | 213     | 7       | 8.18 | 2 | 151     | Sold                     |
| #18 | D | 2202    | 340     | 3       | 3.48 | 2 | 445     | Sold                     |
| #19 | D | 1214    | 72      | 2       | 2.60 | 3 | 314     | Culling (mastitis)       |
| #20 | E | 2396    | 197     | 5       | 9.14 | 1 | 535     | Culling (mastitis)       |
| #21 | E | 3007    | 218     | 6       | 7.30 | 2 | 403     | Culling (mastitis)       |
| #22 | E | 2896    | 100     | 6       | 4.14 | 4 | Unknown | Unknown                  |
| #23 | F | 1628    | 297     | 2       | 7.39 | 1 | 610     | Death (unknown reason)   |
| #24 | F | 1922    | 14      | 4       | 6.70 | 3 | 147     | Culling (mastitis)       |
| #25 | G | 1580    | Unknown | Unknown | 3.00 | 1 | 1045    | Culling (unknown reason) |
| #26 | G | 1215    | Unknown | Unknown | 8.18 | 2 | 80      | Culling (unknown reason) |
| #27 | H | 2918    | 642     | Unknown | 5.30 | 4 | 89      | Culling (unknown reason) |
| #28 | I | 789     | 50      | 1       | 4.70 | 2 | 541     | Culling (mastitis)       |
| #29 | J | Unknown | Unknown | Unknown | 6.37 | 3 | Unknown | Unknown                  |
| #30 | K | 2287    | 514     | 3       | 2.30 | 3 | 21      | Sold                     |
| #31 | L | 1810    | 93      | 3       | 4.60 | 4 | Unknown | Unknown                  |
| #32 | M | 2950    | 364     | Unknown | 6.41 | 1 | 243     | Culling (unknown reason) |

|     |   |         |         |         |      |   |         |                                        |
|-----|---|---------|---------|---------|------|---|---------|----------------------------------------|
| #33 | N | 2033    | 2       | 4       | 8.28 | 3 | 1312    | Culling (planned for low productivity) |
| #34 | O | Unknown | Unknown | Unknown | 6.34 | 2 | Unknown | Unknown                                |
| #35 | P | 1714    | Unknown | Unknown | 4.18 | 4 | 559     | Culling (unknown reason)               |
| #36 | Q | 1351    | 136     | 2       | 7.00 |   | Unknown | Unknown                                |
| #37 | R | 919     | 3       | 1       | 3.66 | 4 | 845     | Sold                                   |

---

<sup>1</sup> Milk bacterial counts of *Klebsiella pneumoniae* are shown by log<sub>10</sub> colony-forming units/ml.
