# Supplementary material for: Correlation between Polymerase Chain Reaction Identification of Iron Acquisition Genes and an Iron-Deficient Incubation Test for Klebsiella pneumoniae Isolates from Bovine Mastitis
Source: Microorganisms. 2022 May 31;10(6):1138. doi: 10.3390/microorganisms10061138 (PMC9228167; doi:10.3390/microorganisms10061138)
Supplement: Supplementary file 1 [file microorganisms-10-01138-s001.zip › Table S2.pdf]

**Table S2.** Primers used in this study.

| Primer name    | Sequence (5'- 3')           | Size of product | References |
|----------------|-----------------------------|-----------------|------------|
| K1-F           | GGTGCTCTTTACATCATTGC        | 1283            | [9]        |
| K1-R           | GCAATGGCCATTTGCGTTAG        |                 |            |
| K2-F           | GACCCGATATTCATACTTGACAGAG   | 641             | [9]        |
| K2-R           | CCTGAAGTAAAATCGTAAATAGATGGC |                 |            |
| <i>magA</i> -F | GGTGCTCTTTACATCATTGC        | 1280            | [9,13]     |
| <i>magA</i> -R | GCAATGGCCATTTGCGTTAG        |                 |            |
| <i>rmpA</i> -F | ACTGGGCTACCTCTGCTTCA        | 536             | [9]        |
| <i>rmpA</i> -R | CTTGCATGAGCCATCTTTCA        |                 |            |
| <i>iucA</i> -F | GCATAGGCGGATA CGAACAT       | 556             | [9]        |
| <i>iucA</i> -R | CACAGGGCAATTG CTTACCT       |                 |            |
| <i>entB</i> -F | TGAAGACGATACCGTGCTGGTGA     | 371             | [14]       |
| <i>entB</i> -R | GTCGGCGACAAAGAACGGTTTGAT    |                 |            |
| <i>fepA</i> -F | CGACGTCTCGGAGATCATT         | 554             | [5]        |
| <i>fepA</i> -R | GATATCAATCTGGCGGTTGTT       |                 |            |
| <i>ybtS</i> -F | CAAAAATGGGCGGTGGATTC        | 242             | [14]       |
| <i>ybtS</i> -R | CCTGACGGAACATAAACGAGCG      |                 |            |

|               |                         |      |        |
|---------------|-------------------------|------|--------|
| <i>psn</i> -F | CAAAC TCCCC AGAGT CTTGC | 1062 | [5]    |
| <i>psn</i> -R | TAGAAGTCCTGCGCTGAAGA    |      |        |
| <i>kfu</i> -F | GAAGTGACGCTGTTTCTGGC    | 797  | [9,13] |
| <i>kfu</i> -R | TTTCGTGTGGCCAGTGA CTC   |      |        |

---
