# Supplementary material for: Correlation between Polymerase Chain Reaction Identification of Iron Acquisition Genes and an Iron-Deficient Incubation Test for Klebsiella pneumoniae Isolates from Bovine Mastitis
Source: Microorganisms. 2022 May 31;10(6):1138. doi: 10.3390/microorganisms10061138 (PMC9228167; doi:10.3390/microorganisms10061138)
Supplement: Supplementary file 1 [file microorganisms-10-01138-s001.zip › Table S3.pdf]

**Table S3.** Polymerase chain reaction (PCR) detection<sup>1</sup> of six iron-acquisition genes in *Klebsiella pneumoniae* isolates tested in this study.

| Isolate | Farm | <i>iucA</i> | <i>entB</i> | <i>fepA</i> | <i>ybtS</i> | <i>psn</i> | <i>kfu</i> | Number of the genes detected by PCR |
|---------|------|-------------|-------------|-------------|-------------|------------|------------|-------------------------------------|
| #1      | A    | -           | -           | -           | -           | -          | -          | 0                                   |
| #2      | A    | -           | -           | -           | -           | -          | -          | 0                                   |
| #3      | A    | -           | -           | -           | -           | -          | -          | 0                                   |
| #4      | A    | -           | -           | -           | -           | -          | -          | 0                                   |
| #5      | A    | -           | -           | +           | -           | -          | -          | 1                                   |
| #6      | A    | -           | +           | +           | -           | -          | +          | 3                                   |
| #7      | A    | -           | +           | +           | +           | +          | -          | 4                                   |
| #8      | A    | -           | +           | +           | +           | +          | +          | 5                                   |
| #9      | B    | -           | +           | -           | -           | -          | -          | 1                                   |
| #10     | B    | -           | -           | +           | -           | -          | +          | 2                                   |
| #11     | B    | -           | +           | +           | -           | -          | -          | 2                                   |
| #12     | B    | -           | +           | +           | -           | -          | -          | 2                                   |
| #13     | C    | -           | -           | +           | -           | -          | -          | 1                                   |
| #14     | C    | -           | +           | +           | -           | -          | -          | 2                                   |
| #15     | C    | -           | +           | +           | -           | -          | -          | 2                                   |
| #16     | C    | -           | +           | +           | -           | -          | +          | 3                                   |

|     |   |   |   |   |   |   |   |   |
|-----|---|---|---|---|---|---|---|---|
| #17 | D | - | + | - | - | + | - | 2 |
| #18 | D | - | + | + | - | - | - | 2 |
| #19 | D | - | + | + | - | - | - | 2 |
| #20 | E | - | - | + | - | - | - | 1 |
| #21 | E | - | + | + | - | - | - | 2 |
| #22 | E | - | + | + | - | - | + | 3 |
| #23 | F | - | - | - | - | - | - | 0 |
| #24 | F | - | + | + | - | - | + | 3 |
| #25 | G | - | - | + | - | - | + | 2 |
| #26 | G | - | + | + | - | - | - | 2 |
| #27 | H | - | - | - | - | - | - | 0 |
| #28 | I | - | - | - | - | + | - | 1 |
| #29 | J | - | + | - | - | - | - | 1 |
| #30 | K | - | + | - | - | - | + | 2 |
| #31 | L | - | + | + | - | - | - | 2 |
| #32 | M | - | + | + | - | - | - | 2 |
| #33 | N | - | + | - | - | + | + | 3 |

|                             |   |   |      |      |      |      |      |                        |
|-----------------------------|---|---|------|------|------|------|------|------------------------|
| #34                         | O | - | +    | +    | -    | -    | +    | 3                      |
| #35                         | P | - | +    | +    | -    | +    | +    | 4                      |
| #36                         | Q | - | +    | +    | +    | +    | +    | 5                      |
| #37                         | R | - | +    | +    | +    | +    | +    | 5                      |
| <hr/>                       |   |   |      |      |      |      |      |                        |
| Proportion <sup>2</sup> (%) |   | 0 | 67.6 | 67.6 | 10.8 | 21.6 | 35.1 | 2.6 (1.7) <sup>3</sup> |
| <hr/>                       |   |   |      |      |      |      |      |                        |

<sup>1</sup>+ and -, Each iron-acquisition gene is detected or not detected by the PCR test, respectively.

<sup>2</sup>Proportion of the isolates with PCR-detection of each iron-acquisition gene, out of 37 strains tested in this study.

<sup>3</sup>Mean (standard deviation) of PCR-detection numbers of iron-acquisition genes in 37 isolates.
