# Supplementary material for: Correlation between Polymerase Chain Reaction Identification of Iron Acquisition Genes and an Iron-Deficient Incubation Test for Klebsiella pneumoniae Isolates from Bovine Mastitis
Source: Microorganisms. 2022 May 31;10(6):1138. doi: 10.3390/microorganisms10061138 (PMC9228167; doi:10.3390/microorganisms10061138)
Supplement: Supplementary file 1 [file microorganisms-10-01138-s001.zip › Table S4.pdf]

**Table S4.** Association between bacterial counts [means (standard deviations); log<sub>10</sub> colony-forming units/ml] and polymerase-chain-reaction (PCR)-positive iron-acquisition genes in *Klebsiella pneumoniae* isolates incubated in iron-half-sufficient medium.

| Gene        | PCR <sup>1</sup> | Day 0                    | Day 1                    | Day 2                    | Day 3                    |
|-------------|------------------|--------------------------|--------------------------|--------------------------|--------------------------|
| <i>entB</i> | +                | 5.46 (0.20) <sup>a</sup> | 7.65 (0.85) <sup>b</sup> | 8.11 (0.74) <sup>b</sup> | 8.11 (0.83) <sup>b</sup> |
| <i>entB</i> | -                | 5.55 (0.32) <sup>a</sup> | 7.71 (1.10) <sup>b</sup> | 7.89 (0.81) <sup>b</sup> | 7.80 (0.58) <sup>b</sup> |
| <i>fepA</i> | +                | 5.47 (0.25) <sup>a</sup> | 7.70 (0.82) <sup>b</sup> | 8.04 (0.82) <sup>b</sup> | 8.12 (0.73) <sup>b</sup> |
| <i>fepA</i> | -                | 5.53 (0.23) <sup>a</sup> | 7.58 (1.17) <sup>b</sup> | 8.02 (0.65) <sup>b</sup> | 7.78 (0.82) <sup>b</sup> |
| <i>ybtS</i> | +                | 5.52 (0.12) <sup>a</sup> | 7.70 (0.98) <sup>b</sup> | 8.38 (0.58) <sup>b</sup> | 8.59 (0.29) <sup>b</sup> |
| <i>ybtS</i> | -                | 5.49 (0.26) <sup>a</sup> | 7.66 (0.93) <sup>b</sup> | 7.99 (0.78) <sup>b</sup> | 7.94 (0.78) <sup>b</sup> |
| <i>psn</i>  | +                | 5.54 (0.18) <sup>a</sup> | 7.90 (0.87) <sup>b</sup> | 8.18 (0.77) <sup>b</sup> | 8.15 (0.74) <sup>b</sup> |
| <i>psn</i>  | -                | 5.48 (0.26) <sup>a</sup> | 7.60 (0.94) <sup>b</sup> | 7.99 (0.77) <sup>b</sup> | 7.97 (0.78) <sup>b</sup> |
| <i>kfu</i>  | +                | 5.47 (0.27) <sup>a</sup> | 7.93 (0.92) <sup>b</sup> | 8.04 (0.85) <sup>b</sup> | 8.08 (0.88) <sup>b</sup> |
| <i>kfu</i>  | -                | 5.50 (0.24) <sup>a</sup> | 7.52 (0.92) <sup>b</sup> | 8.03 (0.73) <sup>b</sup> | 7.97 (0.71) <sup>b</sup> |
| Total       |                  | 5.49 (0.25) <sup>a</sup> | 7.67 (0.92) <sup>b</sup> | 8.03 (0.76) <sup>b</sup> | 8.01 (0.76) <sup>b</sup> |

<sup>1</sup>+ and -, Each iron-acquisition gene is detected or not detected by the PCR test, respectively.

<sup>a,b</sup> Within row (among 0–3 incubation days) for each incubation group, numbers with different superscripts are significantly different ( $p < 0.05$ ).
